# Supplementary material for: Extraction of lanthanides and actinides by a magnetically assisted chemical separation technique based on CMPO-calix[4]arenes
Source: Royal Society of Chemistry journal article supplement (doi:10.1039/b009679m), 2001-01-01
Supplement: b009679m.doc [file b009679m.doc]

Supplementary material for:

**Ref**.: B009679M,

**Title** : Extraction of Lanthanides and Actinides by a Magnetically Assisted Chemical Separation Technique Based on CMPO-Calix[4]arenes

**5,11,17,23-Tetraamino-25,26-dipropoxy-27,28-di(3-phthalimidopropoxy)­calix[4]arene (6):** Calix[4]arene **5** (1.5 g, 1.4 mmol) was boiled under reflux with Sn(II)Cl2.H2O (6.6 g) in EtOH (40 cm3) for 18 h. The mixture was poured onto ice water and, after the addition of CH2Cl2 (300 cm3) stirred for 1 h. Aq. NaOH (1 M, 300 cm3) was then added and stirring continued for 1 h. The organic layer was washed with water and brine. Drying and evaporation gave **6** (1.2 g, 89 %) as a pale buff foam. MS (FD) *m/z* 942.8 (M+, calc 943.4), H ((CD3)2SO) 0.79 (t, 6 H, *J* = 7.3 Hz, CH2*CH3*), 1.66 (m, 4 H, *J* = 7.3 Hz, *CH2*CH3), 2.28 (m, 4 H, *J* = 7.1 Hz, *CH2*CH2N), 2.75 (d, 4 H, *J* = 12.7 Hz, Ar*CH2*Ar), 3.45 (t, 4 H, *J* = 7.3 Hz, *OCH2*CH2CH3) 3.64 (t, 4 H, *J* = 6.8 Hz, *CH2*N), 3.83 (t, 4 H, *J* = 7.8 Hz, O*CH2*) 4.10 (d, 4 H, *J* = 12.7 Hz Ar*CH2*Ar), 4.3 (b, 4 H, NH2), 5.73 (s, 4 H Ar), 6.12 (s, 4 H, Ar), 7.80 (m, 8 H, Ar-Phth).

**5,11,17,23-TetraCMPO-25,26-dipropoxy-27,28-di(3-phthalimido­propoxy)-calix­[4]­arene (7):** *p*-Nitrophenyl (diphenyl­phosphoryl)­acetate (2.5 g, 6.7 mmol) was heated with **6** (1.1 g, 1.1 mmol) in toluene (30 cm3) at 50C for 18 h. The evaporation residue was dissolved in CH2Cl2. The solution was washed repeatedly with 10% aq. NaOH, dried and the solvent evaporated. Chromatography (CHCl3/MeOH 30:1) followed by precipitation from CH2Cl2/Et2O gave **7** (1.4 g, 68 %) as a white solid. mp 178-182 °C, MS (FD) *m/z* 1911.9 (M+, calc 1911.6), H ((CD3)2SO) 0.83 (t, 6 H, *J* = 7.0 Hz, CH2*CH3*), 1.66 (m, 4 H, *CH2*CH3), 2.12 (m, 4 H, *CH2*CH2N), 3.00 (d, 4 H, *J* = 13.2 Hz, Ar*CH2*Ar), 3.59-3.76 (m, 16 H, *OCH2*CH2CH3 + *CH2*N + PO*CH2*CO), 3.93 (m, 4 H, O*CH2*) 4.23 (d, 4 H, *J* = 12.7 Hz Ar*CH2*Ar), 6.39 (s, 4 H Ar), 6.93 (s, 4 H, Ar), 7.43-7.84 (m, 48 H, Ar-Phth + *Ph2*P), 9.34 (s, 2H, NH), 9.77 (s, 2 H, NH).

**5,11,17,23-Tetra-CMPO-25,26-dipropoxy-27,28-diaminopropoxy-calix­[4]­arene (8):** Hydrazine hydrate (1.48 cm3) was boiled under reflux with **7** (300 mg, 0.16 mmol)in ethanol (10 cm3) for 1h. The evaporation residue was dissolved in a mixture of CH2Cl2 and water. The aqueous layer was washed four times with CH2Cl2; the combined organic layers were then washed with brine and the solvent was evaporated to give **8** (254 mg, 96 %) as a light yellow foam. MS (ES) *m/z* 826.82 ([M + 2H]2+, calc 826.30), H ((CD3)2SO) 0.88 (t, 6 H, *J* = 7.3 Hz, CH2*CH3*), 1.85 (m, 8 H, *CH2*CH3 + *CH2*CH2N), 2.72 (t, 4 H, *J* = 6.8 Hz, *CH2*N), 3.01 (d, 4 H, *J* = 13.2 Hz, Ar*CH2*Ar), 3.50 (br, 8H, NH2) 3.62-3.78 (m, 16 H, *OCH2*CH2CH3 + PO*CH2*CO + O*CH2*CH2NH2) 4.25 (d, 4 H, *J* = 13.2 Hz Ar*CH2*Ar), 6.54 (s, 4 H Ar), 6.80 (s, 4 H, Ar), 7.45-7.82 (m, 40 H, *Ph2*P), 9.47 (s, 2H, NH), 9.68 (s, 2 H, NH).

**Immobilization of 1 and 8 on the surface of nonmagnetic and magnetic particles:** The surface charge density of nonmagnetic silica particles **In** (sicastar®, diameter: 800 nm) and magnetic silica particles **Im** (sicastar®-M, diameter: 1500 nm) was determined by streaming potential measurements (PCD-03pH, Mütek, Germany) with 0.001 N poly-diallyldimethylammoniumchloride (polyDADMAC). The density of carboxylic acid groups on both particle types is 50 µmol per g particle. For each immobilization reaction silica particles **In** or **Im** (1 g) were suspended in CH2Cl2 (20 cm3). After activation of the carboxylic acid groups with an excess of DCC (20.6 mg, 100 µmol), the particles were treated with compound **1** (15.8 mg, 50 µmol) and with compound **8** (20,6 mg, 12.5 µmol), respectively. After washing by centrifugation (**IIn** and **IIIn**) or magnetic separation (**IIm** and **IIIm**) the particles were dried in air.

**Extraction Studies**. Aqueous phases were prepared by dissolving a weighed amount of lanthanide nitrate (cM = 10-5 M) in a 1 M nitric acid solution containing 4M NaNO3. Actinides were used at trace level (cM = 10-8 – 10-9 M corresponding to an activity of about 1500kBqL-1). 1.5 cm3 of the aqueous phase was shaken with particles (20 mg) (27 h for the nonmagnetic and 19 h for the magnetic particles) then separated by centrifugation (or magnetic techniques). The initial and final concentrations of the lanthanides and actinides in the aqueous phases were determined gamma spectrometry.
